# Supplementary material
Source: PubMed Central journal article supplement (PMC5891435)

Figure 1

B

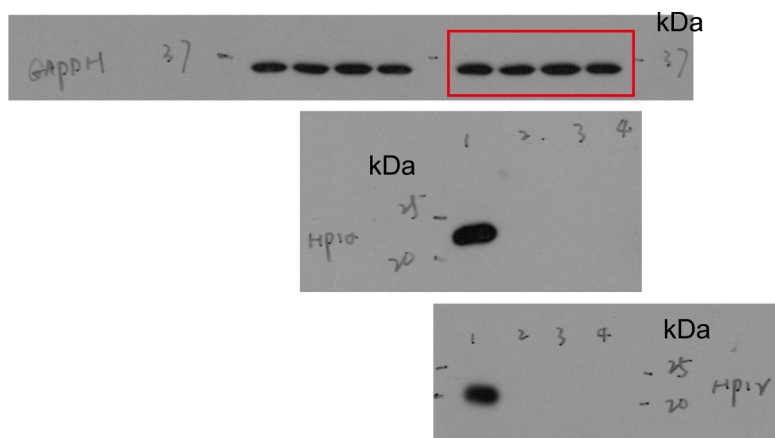

Supplement: EMBR-19-e45484-s010.pdf [file EMBR-19-e45484-s010.pdf]

**Figure 3**

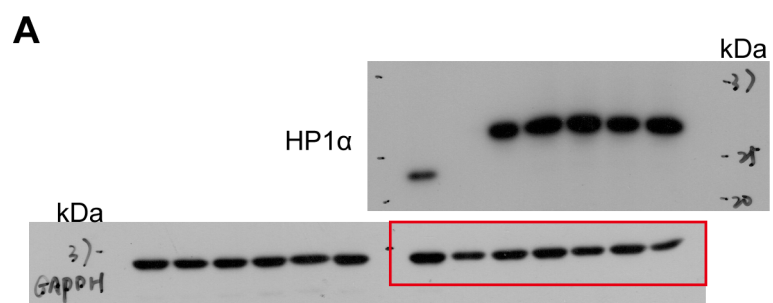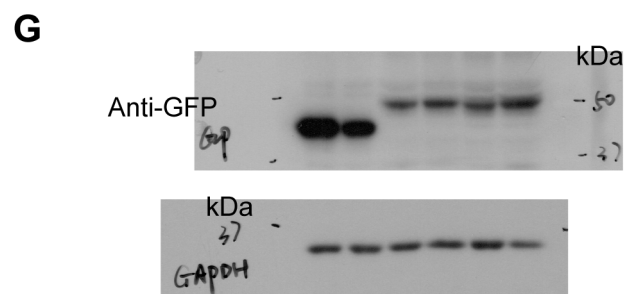

Supplement: EMBR-19-e45484-s011.pdf [file EMBR-19-e45484-s011.pdf]

**Figure 4**

**A**

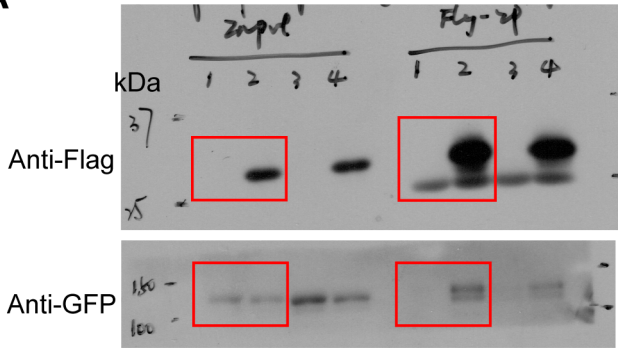

**B**

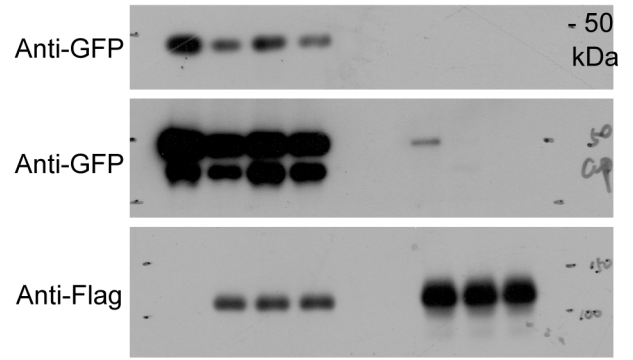

**C**

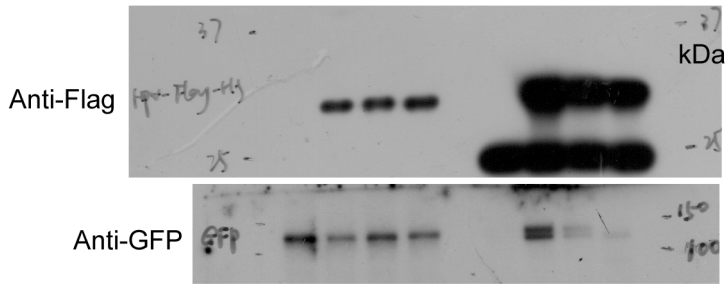

**D**

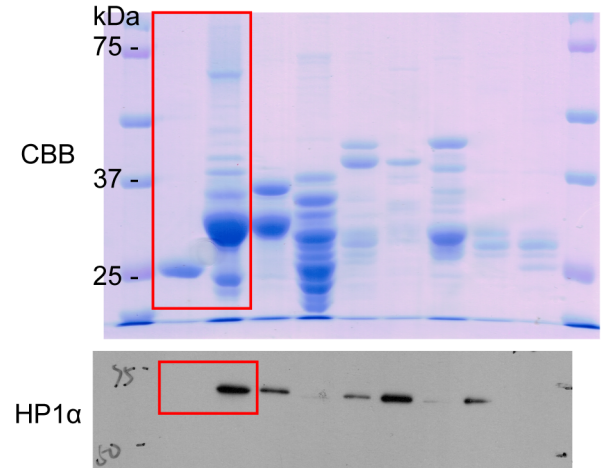

**E**

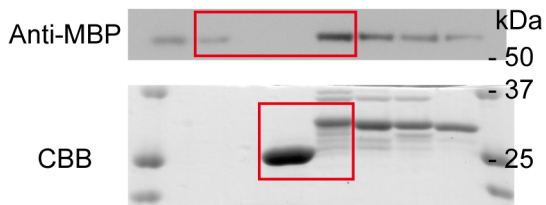

**F**

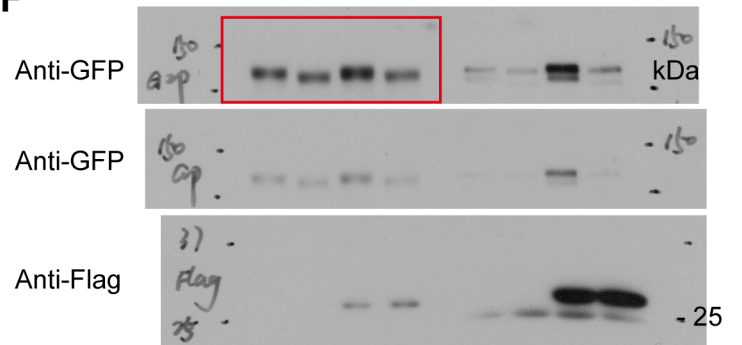

**G**

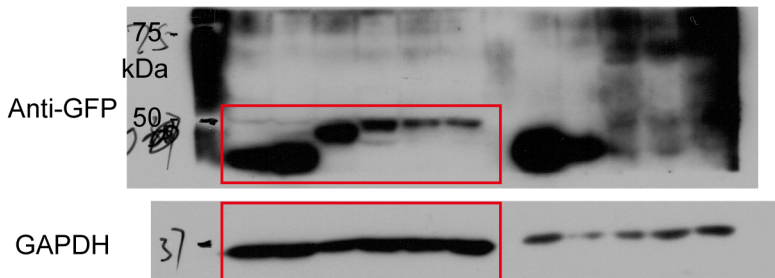

**J**

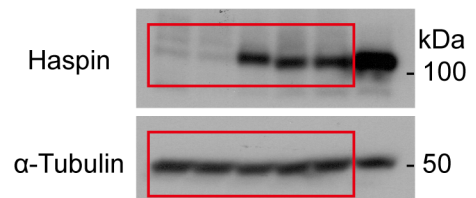

Supplement: EMBR-19-e45484-s012.pdf [file EMBR-19-e45484-s012.pdf]

**Figure 5**

**B**

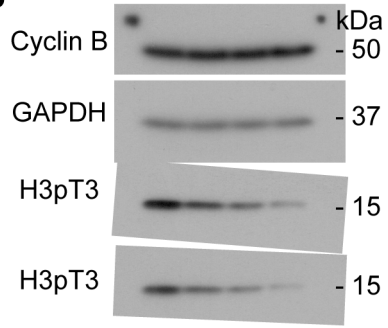

**F**

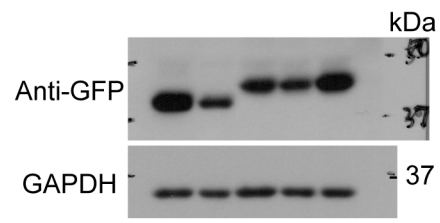

**I**

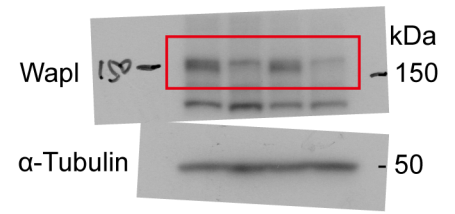

Supplement: EMBR-19-e45484-s013.pdf [file EMBR-19-e45484-s013.pdf]
